# Supplementary material
Source: publisher figshare collection journal article supplement (https://acs.figshare.com/ndownloader/files/4717819)

**The First 5,6-Dihydroxyindole Tetramer by Oxidation of 5,5',6,6'-Tetrahydroxy-2,4'-  
biindolyl and an Unexpected Issue of Positional Reactivity En Route to Eumelanin-Related  
Polymers.**

**Lucia Panzella, Alessandro Pezzella, Alessandra Napolitano  
and Marco d'Ischia\***

| <b>Table of contents:</b>                                            | <b>Page</b> |
|----------------------------------------------------------------------|-------------|
| Experimental Procedures                                              | S2          |
| <sup>1</sup> H NMR spectrum of acetylated <b>7</b>                   | S3          |
| <sup>13</sup> C NMR spectrum of acetylated <b>7</b>                  | S4          |
| <sup>1</sup> H, <sup>1</sup> H COSY spectrum of acetylated <b>7</b>  | S5          |
| ROESY spectrum of acetylated <b>7</b>                                | S6          |
| <sup>1</sup> H, <sup>13</sup> C HSQC spectrum of acetylated <b>7</b> | S7          |
| <sup>1</sup> H, <sup>13</sup> C HMBC spectrum of acetylated <b>7</b> | S8          |

## Experimental Procedures

**General Experimental Methods.** Dimer **2** as tetraacetyl derivative was prepared as previously reported.<sup>9</sup> All other reagents were purchased from commercial sources and used as obtained. UV spectra were obtained on a diode array spectrophotometer. ESI+/MS(HR) spectra were obtained in 1% formic acid-methanol 1:1 v/v. <sup>1</sup>H NMR spectra were recorded at 400 MHz, <sup>13</sup>C NMR spectra at 100 MHz. <sup>1</sup>H, <sup>1</sup>H COSY, <sup>1</sup>H, <sup>13</sup>C HMBC, <sup>1</sup>H, <sup>13</sup>C HSQC and ROESY experiments were run at 400 MHz on an instrument equipped with a 5 mm <sup>1</sup>H/broadband gradient probe with inverse geometry using standard pulse programs. Analytical and preparative TLC were carried out on silica gel plates (0.25 and 0.50 mm, respectively). CHCl<sub>3</sub>: ethyl acetate 65:35 was used as the eluant.

**Oxidation of 2. Isolation of acetylated tetramer 7.** A solution of the tetraacetyl derivative of **2** (45 mg, 0.096 mmol) in methanol (3 mL) was taken under a flux of argon and treated with NaOH 10 mM (9 mL) that had prior been purged with argon. After 10 min 0.1 M HEPPSO buffer (pH 7.4) (45 mL) containing ZnSO<sub>4</sub> × 7H<sub>2</sub>O (27 mg, 1 molar equivalent) was added followed by peroxidase (450 pyrogallol units) and 30% hydrogen peroxide (45 μL). The mixture was taken under vigorous stirring and after about 30 s the reaction was stopped by addition of 0.2 M sodium dithionite in water (10 mL). The mixture was then acidified to pH 4 by addition of 3 M HCl and extracted with ethyl acetate (3 × 30 mL); the combined organic layers were dried over sodium sulphate and taken to dryness, and the residue was acetylated with acetic anhydride/pyridine 95:5 v/v. The residues obtained from three reaction runs as described above were combined and fractionated by preparative TLC to give acetylated **7** (*R<sub>f</sub>* = 0.14, 3 mg, 2% yield, > 90% purity estimated by <sup>1</sup>H NMR analysis). HR ESI+/ MS: found *m/z* 927.2369 [M+H]<sup>+</sup>, calcd for C<sub>48</sub>H<sub>39</sub>N<sub>4</sub>O<sub>16</sub> 927.2361; found *m/z* 949.2173 [M+Na]<sup>+</sup>, calcd for C<sub>48</sub>H<sub>38</sub>NaN<sub>4</sub>O<sub>16</sub> 949.2180. UV (CH<sub>3</sub>OH): λ<sub>max</sub> 214, 313, 339 (sh) nm.

$^1\text{H}$  NMR spectrum of acetylated **7**

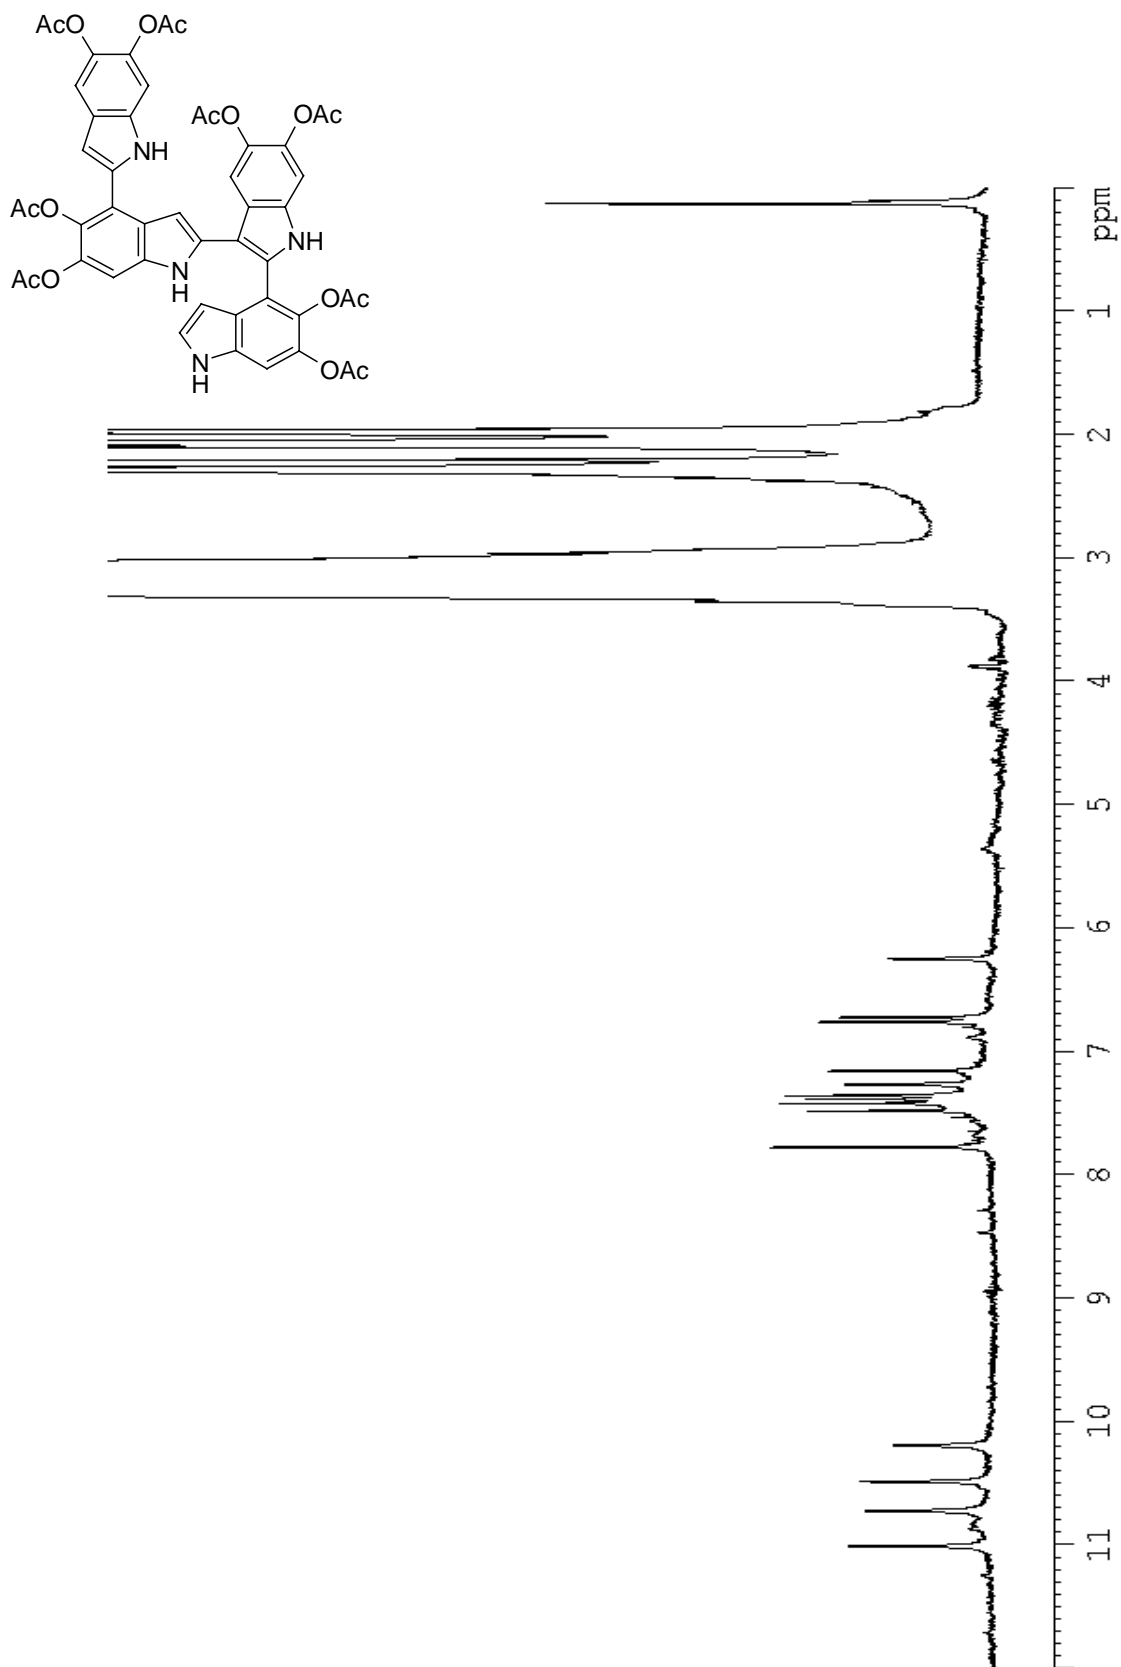

$^{13}\text{C}$  NMR spectrum of acetylated **7**

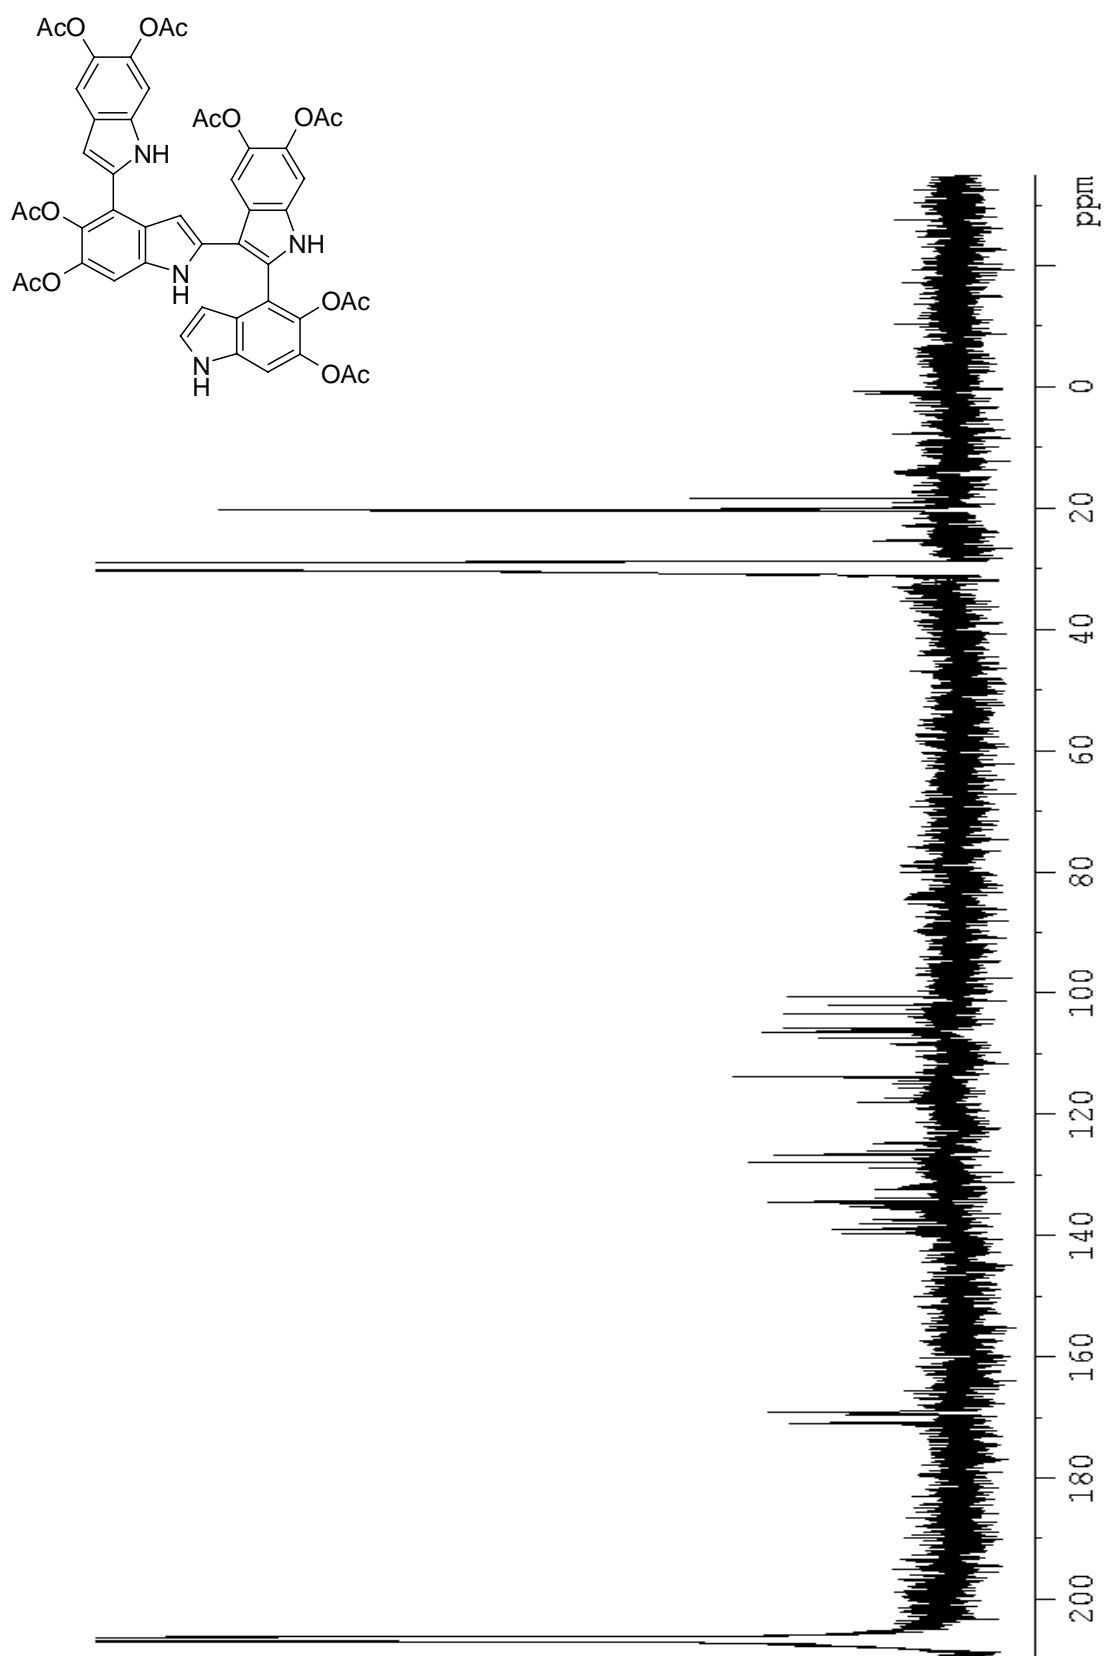

$^1\text{H}$ ,  $^1\text{H}$  COSY spectrum of acetylated **7**

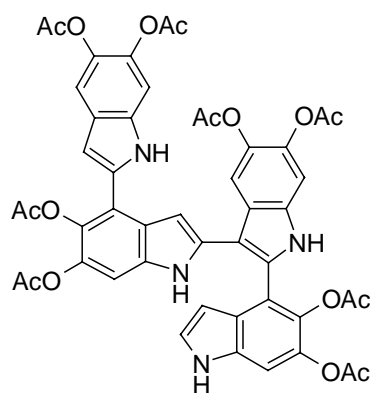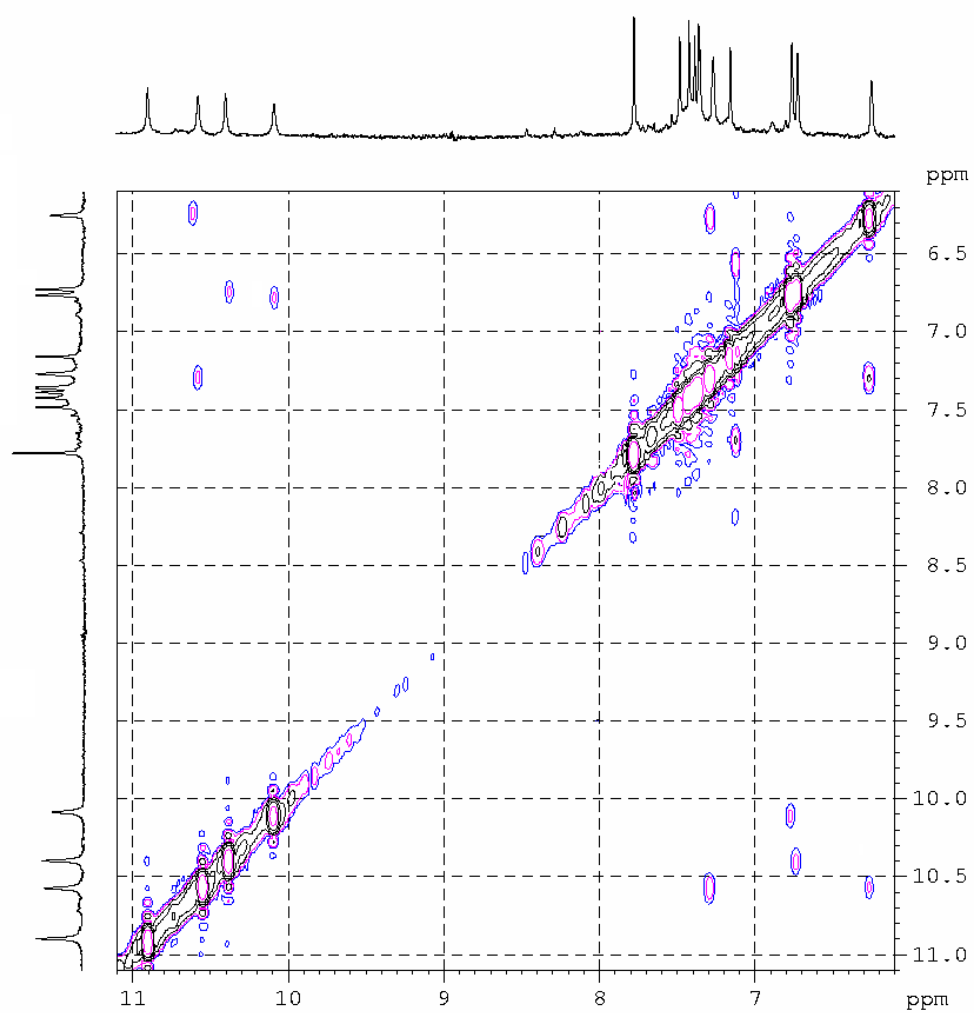

ROESY spectrum of acetylated **7**

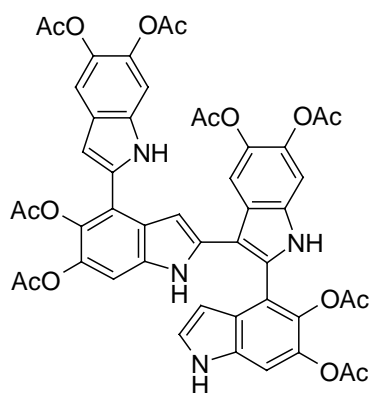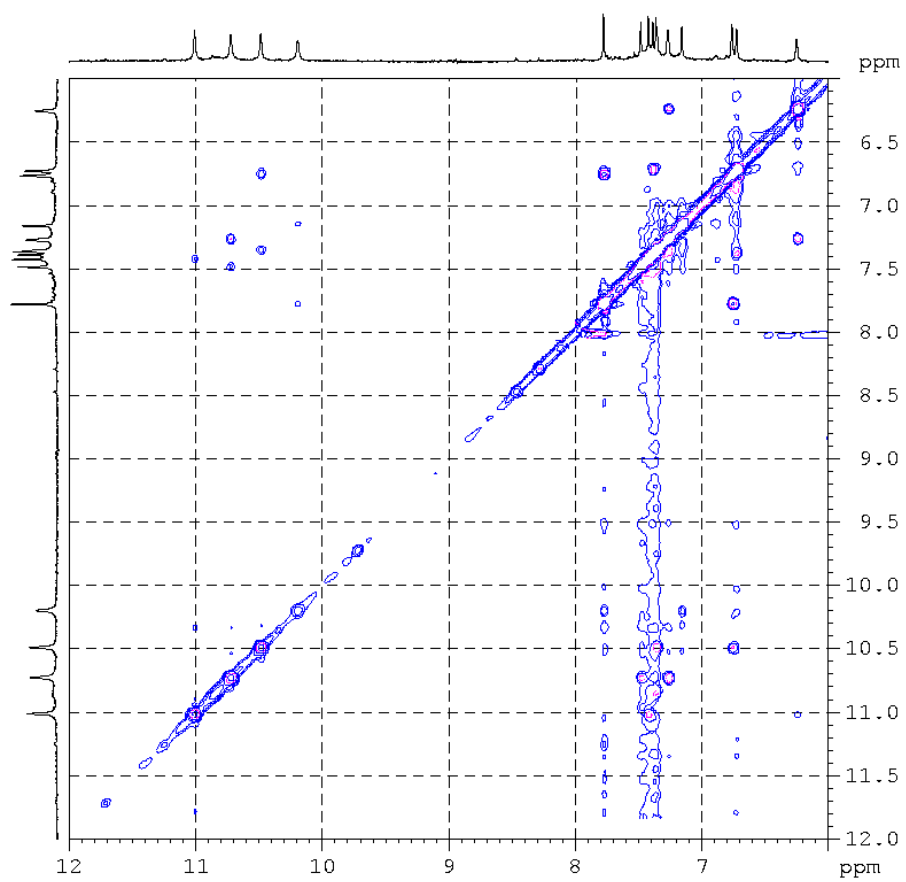

$^1\text{H}$ ,  $^{13}\text{C}$  HSQC spectrum of acetylated **7**

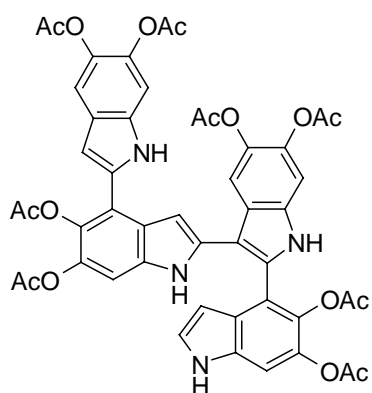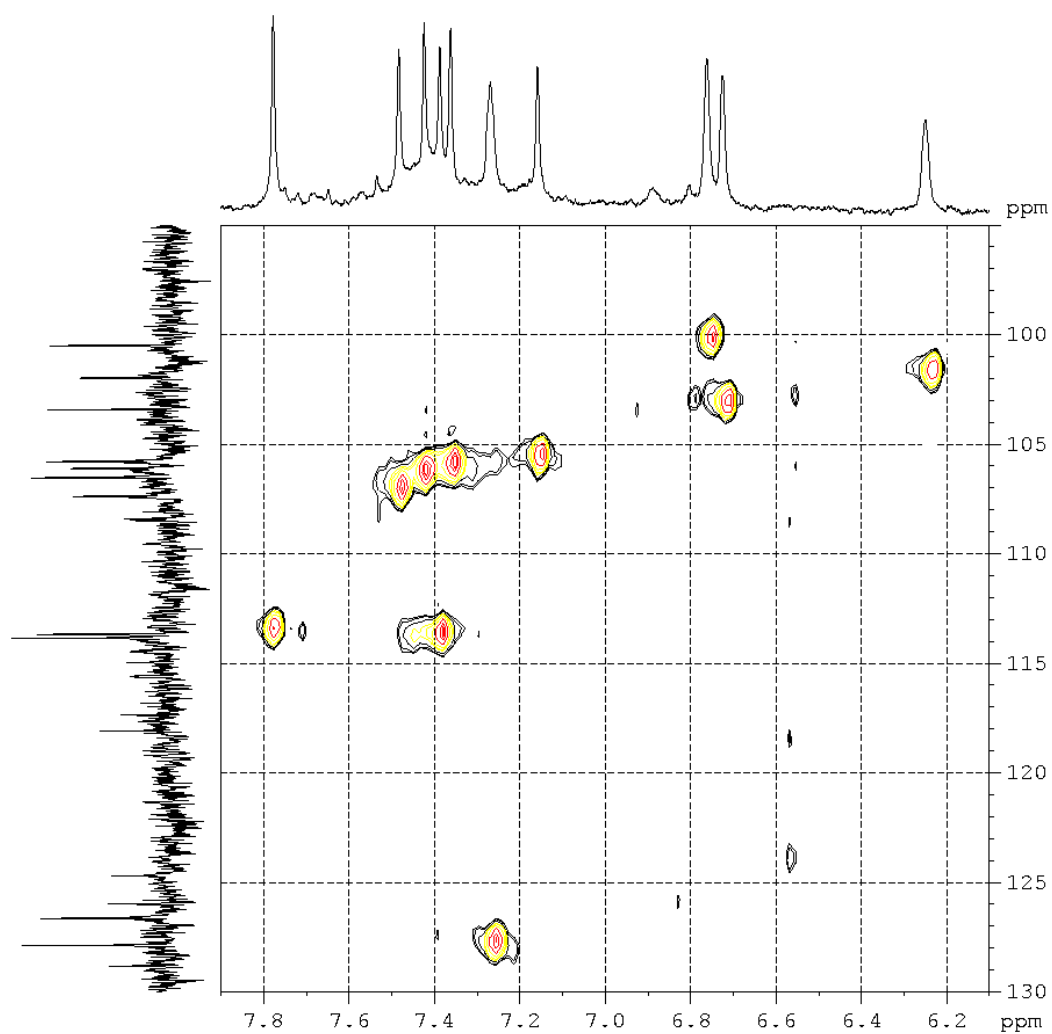

$^1\text{H}$ ,  $^{13}\text{C}$  HMBC spectrum of acetylated **7**

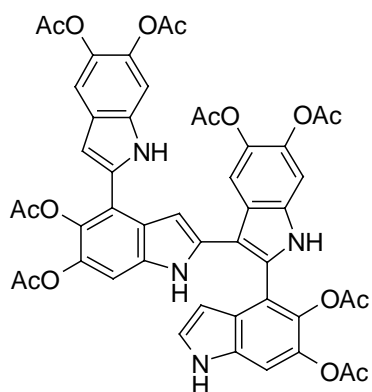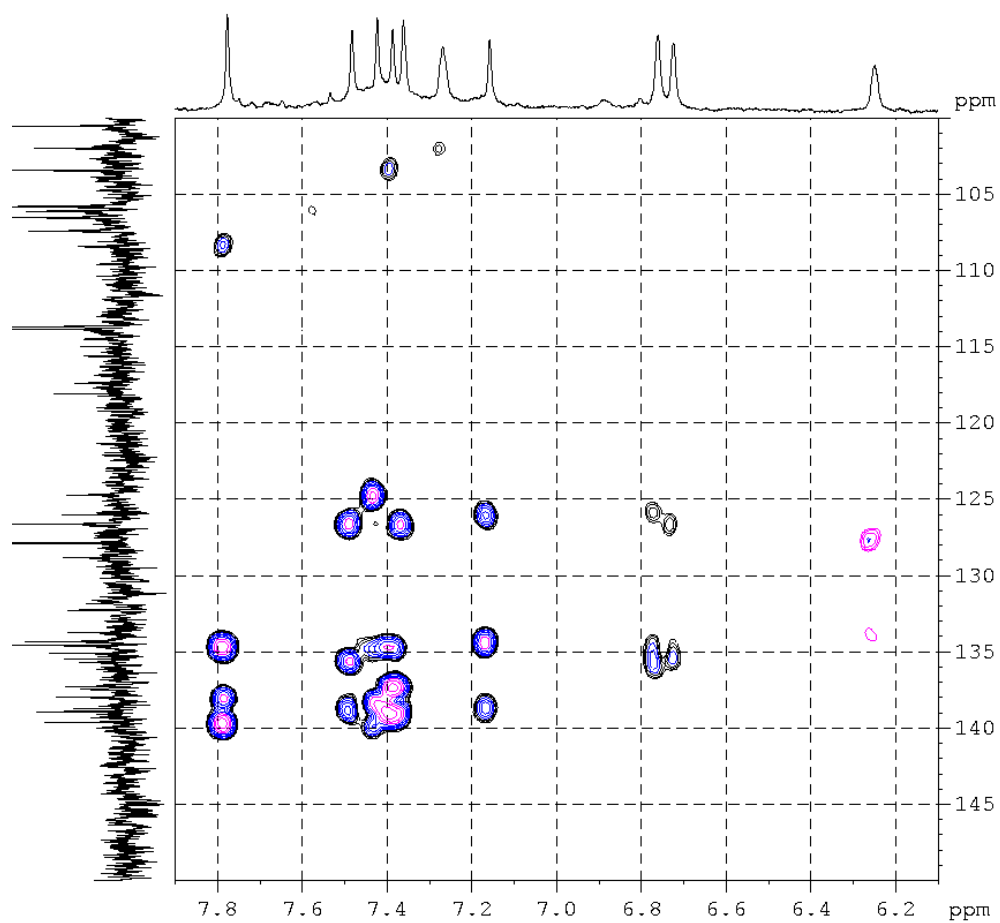

Supplement: Supplementary file 1 [file 4717819]
